## Genomic landscape of reproductive isolation in *Lucania* killifish: The role of sex chromosomes and salinity

Emma L. Berdan<sup>1\*</sup>, Rebecca C. Fuller<sup>2</sup> and Genevieve M. Kozak<sup>3</sup>

<sup>1</sup>Department of Marine Sciences, University of Gothenburg, Gothenburg, Sweden

<sup>2</sup>Department of Animal Biology, University of Illinois Urbana-Champaign, Champaign, IL, USA

<sup>3</sup>Department of Biology, University of Massachusetts-Dartmouth, Dartmouth, MA, USA

\* Corresponding author: [emma.berdan@gmail.com](mailto:emma.berdan@gmail.com)

### 1 **ABSTRACT**

2 Understanding how speciation occurs and how reproductive barriers contribute to population  
3 structure at a genomic scale requires elucidating the genetic architecture of reproductive isolating  
4 barriers. In particular, it is crucial to determine if loci underlying reproductive isolation are  
5 genetically linked or if they are located on sex chromosomes, which have unique inheritance and  
6 population genetic properties. Bluefin killifish (*Lucania goodei*) and rainwater killifish (*L.*  
7 *parva*) are closely related species that have diverged across a salinity gradient and are  
8 reproductively isolated by assortative mating, hybrid male infertility, viability of hybrid  
9 offspring at high salinities, as well as reduced overall fitness of F2 offspring and backcrosses to  
10 *L. goodei*. We conducted QTL mapping in backcrosses between *L. parva* and *L. goodei* to  
11 determine the genetic architecture of sex determination, mate attractiveness, fertility, and salinity  
12 tolerance. We find that the sex locus appears to be male determining and located on a  
13 chromosome that has undergone a Robertsonian fusion in *L. parva* relative to *L. goodei*. We find  
14 that the sex locus on the fused chromosome is involved in several genomic incompatibilities,  
15 which affect the survival of backcrossed offspring. Among the backcrossed offspring that  
16 survived to adulthood, we find that one QTL for male attractiveness to *L. goodei* females is  
17 closely linked to this sex locus on chromosome 1. Males homozygous for *L. goodei* alleles at the  
18 sex locus laid more eggs with *L. goodei* females. QTL associated with salinity tolerance were  
19 spread across the genome but did not tend to co-localize with reproductive isolation. Thus,  
20 speciation in this system appears to be driven by reinforcement and indirect selection against  
21 hybrids rather than direct natural selection for salinity tolerance. Our work adds to growing  
22 evidence that sex chromosome evolution may contribute to speciation.

23  
24 **Keywords:** speciation, behavioral isolation, chromosomal rearrangements, salinity tolerance,  
25 Robertsonian fusion

## 26 INTRODUCTION

27  
28 Progress towards speciation can depend on extrinsic interactions of populations with their  
29 environment and intrinsic genomic architecture that separately or together cause a reduction in  
30 gene flow (Campbell *et al.*, 2018). Gene flow and recombination directly oppose divergence and  
31 speciation because they homogenize allelic combinations that are unique to each population  
32 (Felsenstein, 1981; Butlin, 2005). Adaptation to abiotic and biotic features of the environment  
33 can lead to phenotypic changes among populations, causing reductions in mating rate or hybrid  
34 viability that reduce the probability of gene flow (Coyne & Orr, 2004; Schluter, 2009; Nosil,  
35 2012). Rearrangements in chromosomal structure reduce recombination by suppressing it  
36 between homologous chromosomes with different arrangements. If the genes that underlie  
37 reproductive isolation and/or ecological divergence are present in regions of low recombination,  
38 then they are protected from gene flow even when hybridization occurs, making genome  
39 divergence and ultimately speciation much more likely (Noor *et al.*, 2001; Kirkpatrick & Barton,  
40 2006; Hoffmann & Rieseberg 2008, Faria & Navarro, 2010; Lowry & Willis, 2010;  
41 Wellenreuther & Bernatchez, 2018; Charlesworth & Barton, 2018; Wellenreuther *et al.*, 2019).  
42 Sex-determining loci can also function to reduce recombination across a chromosome when  
43 heterozygous, which can lead to faster genomic divergence on sex chromosomes (Meisel &  
44 Connallon, 2013; Sackton *et al.*, 2014). The relative roles of external forces and internal  
45 architectural features in divergence is an area of active speciation genomics research (Campbell  
46 *et al.*, 2018).

47  
48 Genomic studies that map traits relevant to environmental features and reproductive isolation are  
49 key to understanding the relative roles of extrinsic and intrinsic forces in speciation. As the  
50 process of speciation involves multiple reproductive isolating barriers that reduce gene flow  
51 among incipient species, it is important to study how these barriers build up, become associated  
52 with one another in the genome, and potentially generate emergent reproductive isolation when  
53 coincident (Butlin & Smadja, 2018). If a chromosomal rearrangement has facilitated ecological  
54 divergence, the expectation would be that ecologically important traits map to the rearranged  
55 region. Linkage of multiple ecological traits can drive the spread of a rearrangement in  
56 theoretical models (Kirkpatrick & Barton, 2006). Chromosomal rearrangements may also be  
57 expected to link multiple forms of reproductive isolation, such as loci causing assortative mating  
58 with those contributing to hybrid incompatibilities (Trickett & Butlin, 1994; Dagilis &  
59 Kirkpatrick, 2016). Due to reduced recombination and increased genomic divergence, sex  
60 chromosomes also contribute substantially to speciation, harboring more reproductive isolating  
61 loci than other chromosomes (Coyne, 1992; Turelli & Orr 2000; Presgraves, 2008; 2018). This is  
62 often referred to as the “large X effect” although it occurs on all types of sex chromosomes (Z:  
63 Dopman *et al.* 2004; W: Saether *et al.*, 2007; neo-Y: Kitano *et al.*, 2009).

64  
65 One of the key extrinsic features that contributes to speciation in marine environments is  
66 adaptation to salinity (Lee & Bell, 1999; Hrbek & Meyer, 2003; Huyse *et al.*, 2004; Whitehead,  
67 2010; Betancur *et al.*, 2015). Environmental salinity requires complex physiological adaptation  
68 because in high salinity environments, organisms are subject to ion influxes and loss of water  
69 from tissues. Conversely in low salinity environments, fluxes of water into tissues and loss of  
70 ions to the environment occurs (Evans *et al.*, 2005; Evans, 2008). This complex adaptation  
71 causes divergence in many tissues and can lead to speciation as a direct consequence of

72 adaptation to salinity (Taylor, 1999; Seehausen & Wagner, 2014). Previous work suggests the  
73 genomic basis of this important physiological trait may be dispersed across the genome. For  
74 example, in Atlantic cod, adaptation to salinity was associated with outlier loci on 11 out of 23  
75 linkage groups (48%) (Berg *et al.*, 2015). However, it remains unknown if salinity tolerance loci  
76 might be genetically linked to traits directly related to reproductive isolation, particularly in  
77 species that have diverged along a salinity gradient.

78  
79 Here we map salinity tolerance and reproductive isolation across the genome relative to internal  
80 features, including a chromosomal fusion and the sex locus, in two hybridizing species of  
81 *Lucania* killifish. *Lucania goodei* and *L. parva* are recently diverged sister species (Duggins *et*  
82 *al.*, 1983; Whitehead, 2010) that differ radically in their salinity tolerance. *Lucania goodei* is  
83 found primarily in freshwater sites (restricted mainly to Florida and southern Georgia), while  
84 *Lucania parva* can be found in fresh, brackish, and marine habitats as far west as central Mexico  
85 and as far north as Massachusetts (Lee, 1980). Differential adaptation to salinity between the two  
86 species is present at multiple life stages (Dunson & Travis, 1991; Fuller *et al.*, 2007, Fuller,  
87 2008). Hybrids between *L. parva* and *L. goodei* can be found in the wild (Hubbs *et al.*, 1943), but  
88 multiple reproductive isolating barriers exist. Hybrid sons of *L. parva* females and *L. goodei*  
89 males have reduced fertility, there is reduced viability of hybrid offspring at high salinities, and  
90 reduced overall fitness of F2 offspring and backcrosses to *L. goodei* (Fuller *et al.*, 2007; Fuller  
91 2008). Assortative mating due to male and female preferences also exists between the two  
92 species (Fuller *et al.*, 2007; Berdan & Fuller 2012; Kozak *et al.* 2015; St. John & Fuller, 2019).  
93 Several salinity and fertility related genes show divergence among *L. parva* and *L. goodei*  
94 (Kozak *et al.*, 2014). In *L. parva*, a Robertsonian chromosomal fusion has occurred and two  
95 acentric chromosomes have been fused into a single metacentric one (Berdan *et al.*, 2014). The  
96 sex determining locus is currently unmapped in these species.

97  
98 We genetically mapped the sex determining locus, salinity tolerance, behavioral isolation  
99 (female preference and male attractiveness/preference for each species), and intrinsic postzygotic  
100 isolation (reduced hybrid survival and reduced male fertility) using crosses between these  
101 species. We wanted to determine if these traits mapped to the same area of the genome and, in  
102 particular, if the traits are linked to the chromosomal fusion or the sex locus. To do this, we  
103 created a series of backcrossed hybrids (backcrossed to *L. goodei*), phenotyped the backcrossed  
104 offspring for salinity tolerance, female mating preferences, male attractiveness/preference, and  
105 male fitness, and genotyped the offspring at 4,545 SNPs for map construction and QTL mapping.

## 106 107 108 **METHODS**

### 109 *QTL Mapping Cross*

110 For the QTL mapping of reproductive isolating traits, we created backcrosses to *L. goodei*. The  
111 parental adult *L. goodei* and *L. parva* were collected from a sympatric population at the  
112 Oklawaha River at the Boat Ramp at Delk's Bluff near Ocala (Marion County, Florida). We  
113 subsequently had difficulty obtaining enough *L. parva* from this site to use as stimulus animals in  
114 our behavioral assays (see below), so we also obtained stimulus animals from another sympatric  
115 population on the Wakulla River (Wakulla County, Florida).

116  
117

118  
119 All individuals were collected using dip nets and seines between 2009-2011. Animals were  
120 transported back to the University of Illinois where they were housed by population in 76-liter  
121 (20 gallon) aquaria, 110-liter (29 gallon) aquaria, and 568-liter stock tanks. In all experiments,  
122 our freshwater source was dechlorinated city water treated with Start Right (Jungle Laboratories,  
123 Cibolo, TX). Fish were fed ad lib daily with frozen brine shrimp. Lights were maintained on a  
124 14L:10D cycle.

125  
126 *Backcrosses to L. goodei*

127 We created a series of backcrossed hybrid offspring (backcrossed to *L. goodei*) that we used for  
128 the experiments. In September 2009, we set up our F1 crosses. We performed F1 crosses in both  
129 directions (F1 – *L. goodei* ♀ X *L. parva* ♂, F1r – *L. parva* ♀ X *L. goodei* ♂) using fish that  
130 occurred in sympatry at the Boat Ramp at Delk’s Bluff. We originally set up 5 replicates of each  
131 cross. Each pair of fish was placed in a 38-liter aquarium (10 gallon) with four yarn mops that  
132 served as spawning substrate. Tanks were checked for eggs every 2-3 days. In November 2009,  
133 we added 7 additional replicates: 3 F1 crosses and 4 F1r crosses. Egg checking continued  
134 through April 2010. Eggs were placed in tubs of freshwater and treated with dilute methylene  
135 blue (an anti-fungal agent). After hatching, fry were fed with newly hatched *Artemia salina*. We  
136 recorded the number of eggs that hatched and the number of fry that survived to one month. At  
137 one month of age, fry were put into 110-liter (29 gallon) aquaria where they were raised to  
138 adulthood. We used the adult F1 offspring to create backcrosses to *L. goodei* in July - August  
139 2010. All of the *L. goodei* used in the creation of the backcrosses were from the Delk’s Bluff  
140 population. We created all four types of backcrosses: BC1- F1 ♀ X *L. goodei* ♂, BC2- *L. goodei*  
141 ♀ X F1 ♂, BC3- F1r ♀ X *L. goodei* ♂, and BC4- *L. goodei* ♀ X F1r ♂. Each pair of fish was  
142 placed in a 38-liter aquarium (10 gallon) with four yarn mops that served as spawning substrate.  
143 Tanks were checked for eggs every 2-3 days. A portion of the eggs were used in salinity  
144 tolerance assays and the remainder were raised to adulthood for use in mate choice assays.  
145 Husbandry was identical to that described above for the F1 offspring.

146  
147 *Salinity tolerance*

148 For the salinity tolerance assay, we divided clutches of eggs from backcrosses between fresh  
149 water and salt water. Half of the eggs were placed in fresh water (0.2 ppt), and the other half  
150 were placed in salt water (15 ppt). For the freshwater treatment, eggs were placed in 177 mL (6  
151 ounce) tubs of fresh water (dechlorinated city water) treated with methylene blue (anti-fungal  
152 agent). For the saltwater treatment, eggs were placed in tubs containing water at 15 ppt and  
153 treated with methylene blue. Our saltwater source was reverse osmosis water from a 4-stage  
154 barracuda RO/DI unit (Aqua Engineering and Equipment, Winter Park, Florida) to which we  
155 added Instant Ocean® Sea Salt (Spectrum Brands, Atlanta, GA) to achieve the desired salinity.  
156 Salinity was verified with an YSI-63 salinity meter (YSI Inc., Yellow Springs, OH). After  
157 hatching, fry were fed with newly hatched *Artemia salina*. All fry were raised to one month of  
158 age and euthanized with MS-222 (Argent Chemical Laboratories, Redgemont, WA). Offspring  
159 were stored in ethanol at -20° C until subsequent DNA extraction. We recorded the number of  
160 eggs that hatched and the number of fry that survived to one month.

161

162 *Behavioral isolation*

163 We assayed adult backcrossed female mating preferences in June and July of 2011. We used a  
164 no-choice mating assay which has been used successfully in previous studies of behavioral  
165 isolation in *Lucania* (Fuller *et al.*, 2007; Berdan & Fuller 2012; Kozak *et al.* 2012; St. John &  
166 Fuller, 2019). Backcrossed females were placed in a 38-liter (10 gallon) aquarium with a  
167 stimulus male; either a male *L. goodei* or a male *L. parva*. All of the stimulus males came from  
168 the Delk's Bluff populations. All tanks were provided with four yarn mops that served as  
169 spawning substrate. This resulted in 8 experimental treatments (four types of females and two  
170 types of males). We endeavored to have 5 replicates of each but actual replication varied  
171 depending on the availability of fish. We conducted the following number of replicates: assays  
172 with *L. goodei* males BC1 = 4, BC2 = 2, BC3 = 6, BC 4 = 3; assays with *L. parva* males BC1 =  
173 4, BC2 = 1, BC3 = 4, BC4 = 3; resulting in 27 females total. All females were only tested with  
174 one male. These tanks were checked for eggs every 2<sup>nd</sup> day for 21 days. From these data,  
175 probability of mating, latency to mate and average egg production was calculated. At the end of  
176 the experiment, all females were euthanized with MS-222 and stored in ethanol at -20° C.

177  
178 We assayed male backcrossed offspring for male preference/attractiveness in August and  
179 September of 2011. Here, we also used a no-choice mating assay. Backcrossed male offspring  
180 were placed in a 38-liter (10 gallon) aquarium with a stimulus female: either a female *L. goodei*  
181 or a female *L. parva*. We originally planned for all of the stimulus females to come from the  
182 Delk's Bluff population. However, low abundance of *L. parva* at that site in August 2011  
183 rendered this impossible. We created as many tanks as possible using Delk's females (12 tanks: 6  
184 with *L. goodei* females, and 6 with *L. parva* females), and we used female *L. goodei* and *L. parva*  
185 from the Wakulla River population for the remaining 28 tanks. Delk's Bluff and Wakulla River  
186 are both sympatric freshwater sites. We endeavored to create equal replication for each female  
187 species by male backcross combination, but actual replication varied depending on availability of  
188 fish. We conducted the following number of replicates: assays with Delk's Bluff *L. goodei*  
189 females BC1 = 3, BC2 = 0, BC3 = 0, BC4 = 2; assays with Wakulla River *L. goodei* females  
190 BC1 = 7, BC2 = 1, BC3 = 12, BC4 = 4; assays with Delk's Bluff *L. parva* females BC1 = 4, BC2  
191 = 0, BC3 = 1, BC4 = 2; assays with Wakulla River *L. parva* females BC1 = 8, BC2 = 1, BC3 =  
192 13, BC4 = 4. Overall 29 males were tested with both *L. goodei* and *L. parva* females and 4 were  
193 tested only with *L. parva* females. Males tested with both females (random order) were paired  
194 with a given female for 20 days, and then subsequently paired with a stimulus female of the  
195 opposite species (but from the same population). This resulted in 33 males tested in total (33  
196 with *L. parva*; 29 with *L. goodei*). Tanks were checked every other day for eggs. Probability of  
197 mating (yes or no), latency to mate and egg production data were calculated and served as  
198 indices of male attractiveness/female choice. After mating trials, males were subsequently  
199 euthanized with MS-222 and stored in ethanol at -20° C.

200

201 *Reduced male reproductive success*

202 Previous work on *Lucania* indicates that a large genetic incompatibility is segregating between  
203 the two species that results in some hybrid males having drastically reduced fitness (Fuller  
204 2008). Nearly half of the offspring from male hybrid F1r (*L. parva* female x *L. goodei* male) die  
205 during the first few days of development compared to those from male F1 hybrids (*L. goodei*  
206 female x *L. parva* male). We assayed both the fertilization success and the survival of eggs  
207 spawned by the various backcross males. We checked all collected eggs under the microscope to

208 assess fertilization. We considered eggs that were already dead upon collection to be unfertilized.  
209 We saved the fertilized eggs and measured their survival until hatching. We surveyed a total of  
210 23 males for which we have two measures of male reproductive success: fertilization success and  
211 survival to hatching.

212

### 213 *SNP genotyping and linkage map construction*

214 DNA was extracted using a modified version of the PureGene (Gentra Systems,  
215 [www.gentra.com](http://www.gentra.com)) extraction protocol over four days. On the first day, tissue samples were  
216 placed in 600  $\mu$ l of cell lysis solution (0.1 M Tris, 0.077 M EDTA, and 0.0035 M SDS) with 3  $\mu$ l  
217 of Proteinase K (20 mg/ml). The samples were vortexed and kept at 65° C overnight. On the  
218 second day, 200  $\mu$ l of protein precipitation solution (Qiagen, Valencia, CA) was added to each,  
219 and the samples were vortexed and then stored at 4° C overnight. On day three, the samples were  
220 centrifuged at 12.6 rpm for 5 minutes. For each sample, the supernatant was removed leaving  
221 behind the protein pellet. Six hundred  $\mu$ l of isopropanol was added and the sample was kept at -  
222 20°C overnight. On the final day, the sample was centrifuged at 12.6 rpm for 4 minutes to  
223 precipitate the DNA. The supernatant was removed and 600  $\mu$ l of 70% ethanol was added. The  
224 sample was vortexed and then centrifuged again. The ethanol was removed and the pellet was  
225 allowed to dry and then rehydrated with 30  $\mu$ l of TE. Sample concentration and quality were  
226 verified using a Nanodrop spectrophotometer. DNA was extracted from 173 offspring from the  
227 salinity tolerance assay (61 freshwater, 84 saltwater), 33 males from the male behavioral  
228 isolation and intrinsic isolation assays, and 27 females from the female behavioral isolation  
229 assay. Samples were diluted to a concentration of 75 ng/ $\mu$ l prior to genotyping.

230

231 Species-specific SNPs were designed for the Illumina Infinium assay as described in Berdan *et*  
232 *al.* (2014). DNA samples were genotyped at all SNPs using an Illumina Infinium Bead Chip  
233 custom designed for *Lucania*. Bead chips were scanned using the iScan System (Illumina) at the  
234 Keck Center for Comparative and Functional Genomics at the University of Illinois. Raw data  
235 from the Infinium assay were changed to genotype calls using Illumina GenomeStudio software  
236 v2011.1. Cluster positioning was done automatically for species-specific SNPs. Afterwards  
237 cluster positioning was checked manually and minor adjustments were made to optimize  
238 genotype calls. The no-call threshold was set to 0.15 and genotype calls were exported as  
239 spreadsheets.

240

241 A hybrid linkage map was constructed from F1 hybrid parents using species-specific SNPs in  
242 Joinmap 4.0 (Li *et al.*, 2008) following methods used for constructing *L. parva* and *L. goodei*  
243 maps as described in Berdan *et al.* (2014).

244

245

### 246 *QTL mapping*

247 All QTL mapping and other loci association tests were done in R v.3.5 (R Core Team, 2018).  
248 The distributions of all mapped phenotypes are shown in Supplemental Figure 1 and 2. We  
249 performed QTL analyses separately for all traits. Traits involved in behavioral isolation were  
250 separated by species as loci underlying *L. parva* species recognition might be different than traits  
251 underlying *L. goodei* species recognition. For each species, we analyzed two measures of  
252 behavioral isolation separately: probability of mating and egg production. In the crosses,  
253 individuals tended to mated quickly or not at all (see Figure S2), therefore we mapped

254 probability of mating (whether or not mating occurred over 20 days) as opposed to latency to  
255 mate. Egg production was measured as the average number of eggs produced per day. These  
256 were measured for male backcrossed individuals and female backcrossed individuals separately.  
257 Thus, we had 8 traits that we mapped for behavioral isolation: male preference/attractiveness to  
258 each species as evidenced by egg production and latency to mate (4 traits), female  
259 preference/attractiveness to each species as evidenced by egg production and latency to mate (4  
260 traits). For each of these traits, the QTL mapping was done in rQTL using the hybrid linkage  
261 map and scanone with standard mapping (Broman & Sen, 2009). Probability of mating used a  
262 binary model. We calculated the significance of LOD scores using 500 permutations and the  
263 95% Bayesian credible interval for any significant QTL identified. We also looked for multiple  
264 interacting QTL using the scantwo function, but did not detect any significant QTL. This  
265 scantwo analysis may have been limited in power due to sample size.

#### 266 *Gametic disequilibrium analyses – Interactions Among Loci*

267 The goal here was to determine whether backcrossed offspring differed in their probability of  
268 survival due to interactions among genotypes located on different linkage groups. Incompatible  
269 loci should generate distortions in genotype frequencies in surviving backcrossed individuals. To  
270 do this, we tested for non-random patterns of genotypes, using a chi-squared analysis. We only  
271 included backcrossed offspring that had been raised in fresh water (61 individuals) to avoid the  
272 distorting effects of differential survival in salt water. We considered offspring who were raised  
273 until one month of age (excluding adult backcrossed offspring had little effect on the results).  
274 Along a given linkage group, many of the markers were in complete linkage, so we used one  
275 representative marker from each set in complete linkage. We also only considered patterns  
276 among loci located on different linkage groups. Hence, we did not test for interactions among  
277 loci on the same linkage group. We performed a total of 10,675 tests. For each test, we measured  
278 Chi-squared, the associated p-value, and the frequencies of the four combinations of genotype  
279 (homozygous at both locus 1 and 2, heterozygous at both locus 1 and 2, homozygous at locus  
280 1/heterozygous at locus 2, and vice versa). We corrected for multiple testing by using the  
281 Benjamini and Hochberg false discovery rate (1995) method as implemented in R with ‘p.adjust’  
282 statement.  
283

#### 284 *Salinity tolerance genotype testing*

285 We sought to determine the location of QTL associated with salinity tolerance. To do this, we  
286 compared the frequency of the different genotypes across the genome among offspring raised in  
287 freshwater and saltwater. Survival was lower among offspring raised in salt water (20.9%) than  
288 in fresh water (39.4%). Previous work indicates that juveniles of both *L. goodei* and *L. parva*  
289 survive well in hard, fresh water. We therefore used the frequency of the SNP genotypes among  
290 the 61 freshwater offspring as the expected frequency and asked whether the frequencies in  
291 saltwater differed using the binomial test. We corrected for multiple testing by using the  
292 Benjamini and Hochberg (1995) method as implemented in R with ‘p.adjust’ statement.  
293

#### 294 *Mapping of the sex determining locus*

295 Karyotypes of both *L. goodei* and *L. parva* suggested that the sex chromosomes were  
296 homogametic (Uyeno & Miller 1971; Berdan *et al.*, 2014). Therefore, we evaluated the  
297 possibility of a male determining locus as well as a female determining locus. To search for  
298 markers linked to the sex determining locus, we generated predictions about species-specific  
299

300 markers when different types of F1 hybrids were backcrossed to *L. goodei* (Table S1). For  
301 instance, if the sex locus is male determining (Y-like), then hybrid male offspring of an *L. parva*  
302 female and an *L. goodei* male (*L. parva* ♀ X *L. goodei* ♂) should pass on an *L. goodei* allele to  
303 male offspring and an *L. parva* allele to female offspring. When backcrossed to *L. goodei*, we  
304 expect female offspring to be heterozygous and male offspring to be homozygous for *L. goodei*  
305 alleles for loci linked to the sex locus. If the sex locus is female determining (W-like), then we  
306 expect hybrid females to pass on an *L. parva* allele only to female offspring (Table S1). We used  
307 the QTL mapping cross (backcrosses into *L. goodei*) to test predictions concerning the nature of  
308 sex determination (X-Y versus Z-W) and map the location of the sex determining locus. In  
309 addition, we used animals from two other crosses (one cross between *L. goodei* and *L. parva* and  
310 another between *L. parva* populations) from another study to independently map the location of  
311 the sex determining locus. In all crosses, we tested for an association between alleles and our  
312 predictions using rQTL with the predicted sex-linked loci coded as a binary phenotype (0 for  
313 homozygous, 1 for heterozygous). We used scanone with a binary model to calculate LOD  
314 scores, the significance using 500 permutations and the 95% Bayesian credible interval.

315  
316 To map the male determining loci more finely, we used backcrossed offspring from another  
317 study. In this study, we created another set of hybrid offspring between the two species. Here, we  
318 used two allopatric populations: *L. goodei* from Blue Springs in the Suwanee/Santa Fe River  
319 (Florida) and *L. parva* from Indian River Lagoon (Atlantic Ocean, Florida). Collection methods  
320 and animal husbandry were identical to those described above for the QTL crosses. We used  
321 these offspring from backcrosses between these populations to independently verify the location  
322 of the sex-determination locus. In this study, we generated all possible backcrosses to both *L.*  
323 *goodei* and *L. parva* using both F1 and F1r hybrids parents. We genotyped 50 backcross  
324 offspring (32 from backcrosses to *L. goodei*, 18 from backcrosses to *L. parva*). For this analysis,  
325 we only considered species-specific SNPs (1030 SNPs; 353 of which had a position on the  
326 maps). We separately used the *L. goodei* and *L. parva* maps (Berdan *et al.* 2014) for mapping to  
327 see if this influenced the position of the sex locus. Table S2 shows the predicted genotypes for  
328 males and females for backcrosses to both *L. goodei* and *L. parva*.

329  
330 We also created a series of hybrid crosses between two *L. parva* populations (Indian River,  
331 Florida and Pecos River, Texas). We created hybrids in both directions and created all backcross  
332 types. Collection methods and animal husbandry were identical to those described above for the  
333 QTL crosses. We genotyped 35 hybrid backcrossed individuals. We genotyped 14 offspring (7  
334 females, 7 males) from F1 males (Indian River ♀ x Pecos ♂) and 21 offspring (11 females, 10  
335 males) from F1r males (Pecos ♀ x Indian River ♂). We filtered SNP data and only used alleles  
336 that were fixed between Indian River and Pecos (Kozak *et al.*, 2014) for a total of 1048 SNPs  
337 (821 of which had a position on the *L. parva* map). We mapped the sex-locus using the *L. parva*  
338 linkage map. Again, we tested the genotypes for the expected ratios of  
339 heterozygotes/homozygotes in males and females from backcrosses to each population (Table  
340 S3).

341  
342 All plots were made in R using rQTL, ggplot2 (Wickham, 2017) and LinkageMapView packages  
343 ([github.com/louellette/LinkageMapView](https://github.com/louellette/LinkageMapView)).

344



## 345 RESULTS

346

### 347 *Sex-determining locus*

348 In both the *L. parva* map and the hybrid map, linkage group 1 represents a fusion of two linkage  
349 groups (1A and 1B) from *L. goodei*. All maps had 22 additional linkage groups and are  
350 numbered based on synteny (see Berdan *et al.*, 2014). Using the hybrid linkage map from the  
351 QTL cross, no female sex determining locus was found with all LOD < 1.32 ( $p > 0.53$ ; N = 44  
352 informative individuals). In contrast, we found evidence for a single male-determining sex locus  
353 on chromosome 1 at 0 cM near marker 05836 (LOD = 3.35,  $p=0.014$ , 95% Bayesian Credible  
354 Interval 0-12 cM). Using Indian River *L. parva* and Blue Springs *L. goodei* hybrids backcrossed  
355 to *L. goodei* and *L. parva* with the *L. goodei* linkage map, the male sex determining locus was  
356 located on chromosome 1A at 2 cM between markers 13121 and 14413 (LOD = 5.21, 95%  
357 Bayesian Credible Interval 0.5-3 cM; Figure 1A). Using these same data and the *L. parva* map,  
358 the sex locus was on chromosome 1 at 10.5 cM near marker 13005 (LOD = 6.82,  $p < 0.001$ , 95%  
359 Bayesian Credible Interval 9-11 cM; Figure 1B). Using crosses among *L. parva* populations  
360 (Indian River and Pecos River) backcrossed males and the *L. parva* map, the QTL for the sex  
361 determining loci was located on chromosome 1 at marker 11321 at 20.81 cM (LOD = 7.41,  $p <$   
362  $0.001$ , 95% Bayesian Credible Interval 13-44 cM; N = 36). Thus, the sex determining locus  
363 consistently maps to the chromosome 1A portion of the fused chromosome. Among the *L. parva*  
364 within species/between population crosses, much of the chromosome appears to be in tight  
365 linkage disequilibrium with the sex loci (Figure 1C).

366

### 367 *Gametic Disequilibrium – Interactions Among Loci*

368 The chromosomal fusion was implicated in genetic incompatibilities. The backcrossed offspring  
369 who survived to one month of age were a non-random subset that had favorable combinations of  
370 alleles at different loci. Twenty-six of 10,675 tests for interactions among genotypes at loci on  
371 different linkage groups remained significant even after correcting for multiple tests. Table 2 lists  
372 these markers and the linkage groups on which they are found. While there were 26 significant  
373 interactions, these involved loci on only five pairs of linkage groups. There were multiple  
374 significant interactions involving loci on linkage group 1 and both linkage groups 13 and 16. One  
375 interaction between linkage group 1 and linkage group 13 involved a marker very close to the  
376 sex determination region (marker 13005). There were also significant interactions between  
377 linkage groups 13 and 16, linkage groups 21 and 22, and linkage groups 23 and 2. The  
378 interaction between linkage group 21 and 22 is interesting because it involves markers that  
379 mapped to linkage group 21 in one species and linkage group 22 in the other (a putative  
380 translocation: Berdan *et al.* 2014). All of these interactions among loci involved an over-  
381 representation of offspring that were either homozygous for the *L. goodei* specific marker at both  
382 loci or were heterozygous at both loci. Individuals that were homozygous at one locus, but  
383 heterozygous at another were either absent or under-represented. Supplemental table 4 contains  
384 all of the tests.

385

### 386 *Salinity tolerance*

387 Survival in salt water was approximately half of that in in fresh water (salt water = 20.9%; fresh  
388 water = 39.4%). Backcross survival to one month of age in saltwater was affected by genotype.  
389 We compared the proportion of homozygous (*L. goodei*) and hybrid genotypes at each marker  
390 between fresh and saltwater rearing conditions. Table 1 shows markers that remained statistically

391 significant after an FDR correction. We considered linkage groups with more than one  
392 significant locus as being involved in adaptation to salinity. Linkage groups where heterozygotes  
393 were under-represented in fresh water and over-represented in salt water were: 3, 6, 7, 12, and 17  
394 (Figure 2). The effects were particularly strong for linkage group 7 where the heterozygotes were  
395 1.9 times as abundant in salt water (~0.65) as they were in fresh water (~0.34). Loci at linkage  
396 group 16 showed the opposite pattern where heterozygous individuals were common among  
397 freshwater and rare among saltwater offspring. Table S5 shows the results for all markers.

398

#### 399 *Fertility and Hatching success as a Function of Male Genotype*

400 Male fertility (proportion of unfertilized eggs) mapped to a single QTL located on linkage group  
401 7 at 25 cM (LOD= 4.15,  $p = 0.034$ , Figure 3A). Hybrid viability, the proportion of fertilized eggs  
402 surviving to hatching, mapped to linkage group 1 at 9 cM (LOD = 3.47,  $p = 0.038$ ; Figure 3B).

403

#### 404 *Behavioral isolation*

405 For backcrossed males, the probability of mating occurring over 20 days was only 52% when  
406 paired with *L. parva* females and this trait mapped to linkage group 1, marker 13870 at 57 cM  
407 (LOD=2.87,  $p=0.028$ ; Figure 3C). Males heterozygous for the *L. parva* allele at chromosome 1  
408 were less likely to mate with *L. parva*, suggesting that this allele may not confer attractiveness  
409 and may represent an incompatibility. There were no QTL identified for the probability of a male  
410 mating with *L. goodei* females. The number of eggs laid when males were mated to *L. parva*  
411 females mapped to chromosome 11 at 16.5 cM (LOD = 6.2,  $p = 0.004$ ) (Figure 3D). The number  
412 of eggs a male laid with a *L. goodei* female mapped to chromosome 1 at 32 cM (LOD = 2.89,  $p =$   
413 0.004; Figure 3E).

414

415 For backcrossed females, no significant QTL were identified. There was a weak association ( $p =$   
416 0.11) of number of eggs laid with *L. parva* males on chromosome 6 at 32.5 cM (LOD = 4.19;  
417 Figure 3F).

418

419

## 420 **DISCUSSION**

421

422 In this study, we explored the role of extrinsic and intrinsic factors on speciation in the killifish  
423 *Lucania goodei* and *L. parva* by genetically mapping the sex determining locus, salinity  
424 tolerance, behavioral isolation, and hybrid incompatibilities. We found that salinity tolerance has  
425 a polygenic basis but adaptation to salinity is unlikely to have contributed strongly to the  
426 development of reproductive isolation in this system as salinity tolerance loci rarely overlap with  
427 isolating loci. Instead, a fusion between the chromosome with the sex determining locus and an  
428 autosome in *L. parva* appears to have significantly contributed to speciation as multiple different  
429 components of reproductive isolation mapped there (Figure 4). Below we discuss these results in  
430 more detail.

431

432 Salinity tolerance mapped to numerous locations in the *Lucania* genome revealing a strong  
433 polygenic basis to this trait. This is not surprising as decades of research have revealed that  
434 salinity tolerance in teleosts is a complex trait that involves multiple tissues (e.g, gills, kidneys)  
435 and physiological pathways (Evans *et al.*, 2005; Evans, 2008; Larsen *et al.*, 2011; Lavery &  
436 Skadhauge, 2012). We found that the loci underlying this trait were not grouped together in a

437 single area but were instead spread out across the genome. Other studies of the genomic basis of  
438 salinity tolerance in teleosts have revealed similarly distributed genetic architectures. For  
439 example, a comparison of salinity tolerance QTL in three different salmonids revealed that  
440 between 3 (in *Oncorhynchus mykiss*) and 10 (*Salmo salar* and *Salvelinus alpinus*) linkage groups  
441 are involved (Norman *et al.*, 2012). Salinity tolerance in Atlantic cod (*Gadus morhua*) maps to  
442 11 different linkage groups (Berg *et al.*, 2015). It is unclear if this kind of genetic architecture  
443 will facilitate or hinder the development of reproductive isolation in speciation with gene flow.  
444 For instance, it will be difficult to maintain linkage disequilibrium between loci that are spread  
445 out over many linkage groups when gene flow is high. However, spreading divergent selection  
446 across the genome increases the chance for processes such as divergence hitchhiking (Via &  
447 West, 2008; Via, 2009), leading to increased genome divergence overall.

448  
449 We found little evidence in this study that divergent selection for salinity tolerance in *Lucania*  
450 actually generated reproductive isolation. There are several different ways that divergent natural  
451 selection may generate reproductive isolation. The majority of these mechanisms, such as magic  
452 traits (Gavrilets 2004) and divergence hitchhiking (Via & West, 2008, Via, 2009), predict that  
453 traits that are under divergent natural selection and those that contribute to reproductive isolation  
454 map to the same area of the genome. Although salinity tolerance mapped to 4 different linkage  
455 groups, only linkage group 7 also contained a locus involved in reproductive isolation,  
456 contributing to male fertility. When backcrossed individuals carry *L. goodei* alleles on linkage  
457 group 7, they were more likely to be infertile and survive poorly at high salinities. This area of  
458 the genome is interesting because genomic scans suggest that *L. goodei* and *L. parva* are  
459 differentiated in both sperm-related and ion transport genes (Kozak *et al.*, 2014). However, we  
460 did not detect enough overall co-localization to implicate a general role for natural selection to  
461 salinity leading to divergence hitchhiking or multiple reproductive barriers. There are other  
462 mechanisms by which natural selection may lead to reproductive isolation without the co-  
463 localization of loci. For example, sensory bias may have led to sexual signals that are strongly  
464 adapted to different salinity environments. However, this mechanism has already been ruled out  
465 in this system (Berdan & Fuller, 2012). Thus, divergent natural selection is unlikely to have  
466 directly contributed to the evolution of reproductive isolation in *Lucania* killifish.

467  
468 The chromosomal fusion seems to have played a significant role in the speciation between *L.*  
469 *goodei* and *L. parva* as several components of reproductive isolation map there (Figure 4; Table  
470 3). The male sex determining loci mapped to the fused chromosome in both hybrid (*L. goodei* x  
471 *L. parva*) and pure *L. parva* crosses. This suggests that this Robertsonian fusion in *L. parva*  
472 occurred between the *Lucania* chromosome with the sex determining loci and an autosome.  
473 Chromosomal fusions, often differentiate populations or species and have been shown both  
474 theoretically and empirically to facilitate adaptation (Franchini *et al.*, 2010; Guerrero &  
475 Kirkpatrick, 2014; Dobigny *et al.*, 2017; Wellband *et al.*, 2019). In fishes, sex chromosomes are  
476 often involved in fusions possibly because fusions resolve sexually antagonistic selection  
477 (Kitano & Peichel, 2012) or because male-mutation bias leads to Y-fusions (Pennell *et al.*, 2015).  
478 However, unlike many other known fusions in fish, our fusion does not appear to represent a  
479 neo-Y system with unfused X chromosomes, because both males and females possess fused  
480 chromosomes (Berdan *et al.*, 2014). Our results add to the growing evidence that chromosomal  
481 fusions may facilitate evolutionary processes.

482

483 We found that the fused chromosome contained QTLs for both behavioral isolation (number of  
484 eggs laid with *L. goodei*, probability of mating with *L. parva* females) and hybrid  
485 incompatibilities (number of offspring that survived to hatching and loci contributing to gametic  
486 disequilibrium). Only one other linkage group (LG 7) contained more than a single trait, with  
487 salinity and fertility mapping to LG 7. In order for speciation with gene flow to proceed,  
488 different forms to reproductive isolation must be coupled with one another (Smadja & Butlin,  
489 2011; Butlin & Smadja, 2018). Physical linkage/reduced recombination is one of the strongest  
490 ways to generate linkage disequilibrium and chromosomal rearrangements often play a role in  
491 generating this reduced recombination (Hoffmann & Rieseberg, 2008; Faria & Navarro, 2010;  
492 Wellenreuther & Bernatchez, 2018; Wellenreuther *et al.*, 2019). Chromosomal fusions can  
493 generate linkage disequilibrium in two ways: first by bringing previously unlinked loci together  
494 and second by reducing recombination, especially around the centromere (Dumas & Britton-  
495 Davidian, 2002; Franchini *et al.*, 2010). However, only the QTL for probability of mating with *L.*  
496 *parva* mapped to the formerly autosomal portion of the chromosome (~40-57 cM) and this locus  
497 appeared to function as an incompatibility, with the *L. parva* alleles in an *L. goodei* background  
498 contributing to low mating success. Future work will be needed to determine if physical linkage  
499 of this locus with the other isolating loci was a benefit provided by the fusion, similar to the  
500 situation in Japan Sea sticklebacks where the Y-chromosome fused to an autosome containing a  
501 behavioral isolation locus (Kitano *et al.*, 2009).

502  
503 The genetic architecture of reproductive isolation in *Lucania* is conducive to the process of  
504 reinforcement. Reinforcement occurs when hybrids suffer reduced fitness which generates  
505 selection for increased behavioral isolation in areas of sympatry to avoid mating with  
506 heterospecifics (Servedio & Noor, 2003). Previous behavioral work has found that reinforcement  
507 has contributed significantly to the evolution of species-specific preferences in sympatry in both  
508 sexes of *L. goodei* and *L. parva* (Gregorio *et al.*, 2012; Kozak *et al.*, 2015). Theoretical studies  
509 show stronger reinforcement when incompatibility loci and loci for behavioral isolation are  
510 linked to sex than when they are located on autosomes (Servedio & Saetre, 2003; Lemmon &  
511 Kirkpatrick, 2006; Hall & Kirkpatrick, 2006). The co-localization of both behavioral and  
512 incompatibility loci to the sex chromosome we find is consistent with this theory and the known  
513 role of reinforcement in driving speciation in *Lucania*. Indeed, the degree of sex-linkage of  
514 isolating loci may have predisposed *Lucania* mate preferences toward rapid evolution in  
515 sympatry.

516  
517 In summary, we find that the fused sex chromosome in *L. parva* contributes disproportionately to  
518 reproductive isolation between *L. parva* and *L. goodei*. Salinity tolerance in *L. parva* is  
519 polygenic, distributed across the genome, and rarely co-localizes with reproductive isolating  
520 traits. Speciation in this system appears to be driven by reinforcement and indirect selection  
521 against hybrids rather than direct natural selection for salinity tolerance.

## 522 523 **ACKNOWLEDGEMENTS**

524 This work was funded by a National Science Foundation (NSF) Early Faculty Development  
525 (CAREER) grant (DEB-0953716) to R.C.F, a National Science Foundation Dissertation  
526 Improvement Grant to R.C.F and E.L.B. (DEB-1110658), and a University of Illinois Research  
527 Board Award 11153. This work was approved by the University of Illinois Institutional Animal  
528 Care and Use Committee (protocols 08183 and 09306).

## References

- Benjamini, Y. & Hochberg, Y. 1995. Controlling the false discovery rate - a practical and powerful approach to multiple testing. *Journal of the Royal Statistical Society: Series B Statistical Methodology* **57**: 289-300.
- Berdan, E. L. & Fuller, R. C. 2012. A test for environmental effects on behavioral isolation in two species of killifish. *Evolution: International Journal of Organic Evolution* **66**: 3224-3237.
- Berdan, E. L., Kozak, G. M., Ming, R., Rayburn, A. L., Kiehart, R. & Fuller, R. C. 2014. Insight into genomic changes accompanying divergence: Genetic linkage maps and synteny of *Lucania goodei* and *L. parva* reveal a Robertsonian fusion. *G3: Genes, Genomes, Genetics* **4**: 1363-1372.
- Berg, P. R., Jentoft, S., Star, B., Ring, K. H., Knutsen, H., Lien, S., Jakobsen, K. S., Andre, C. 2015. Adaptation to low salinity promotes genomic divergence in Atlantic cod (*Gadus morhua* L.). *Genome Biology and Evolution* **7**: 1644-63.
- Betancur, R. R., Ortí, G. & Pyron, R. A. 2015. Fossil-based comparative analyses reveal ancient marine ancestry erased by extinction in ray-finned fishes. *Ecology Letters* **18**: 441-450.
- Broman, K.W., and Sen, Ś. (2009). A Guide to QTL Mapping with R/qtl (New York: Springer-Verlag).
- Butlin, R. K. 2005. Recombination and speciation. *Molecular Ecology* **14**: 2621-2635.
- Butlin, R. K. & Smadja, C. M., 2018. Coupling, reinforcement, and speciation. *The American Naturalist* **191**: 155-172.
- Campbell, C. R., J. Poelstra & A. D. Yoder. 2018. What is Speciation Genomics? The roles of ecology, gene flow, and genomic architecture in the formation of species. *Biological Journal of the Linnean Society* **124**: 561-583.
- Charlesworth, B. & Barton, N. H. 2018. The spread of an inversion with migration and selection. *Genetics* **208**: 377-382.
- Charlesworth, D. 2017. Evolution of recombination rates between sex chromosomes. *Philosophical Transactions of the Royal Society B: Biological Sciences* **372**: 20160456.
- Coyne, J. & Orr, H. A. 2004. *Speciation*. Sunderland, MA, Sinauer Associates.
- Coyne, J. A. 1992. Genetics and speciation. *Nature* **355**: 511.
- Dagilis, A. J. & Kirkpatrick, M., 2016. Prezygotic isolation, mating preferences, and the evolution of chromosomal inversions. *Evolution* **70**:1465-1472.

- Dobigny, G., Britton-Davidian, J. & Robinson, T. J. 2017. Chromosomal polymorphism in mammals: an evolutionary perspective. *Biological Reviews* **92**: 1-21.
- Dopman, E. B., Bogdanowicz, S. M., & Harrison, R. G. 2004. Genetic mapping of sexual isolation between E and Z pheromone strains of the European corn borer (*Ostrinia nubilalis*). *Genetics*: **167**:301-309.
- Duggins, C., Karlin A., & Relyea K. 1983. Electrophoretic variation in the killifish genus *Lucania*. *Copeia* **1983**: 564-570.
- Dumas, D. & Britton-Davidian, J. 2002. Chromosomal rearrangements and evolution of recombination: comparison of chiasma distribution patterns in standard and Robertsonian populations of the house mouse. *Genetics* **162**: 1355-1366.
- Dunson, W. A. & Travis J. 1991. The role of abiotic factors in community organization. *The American Naturalist* **138**: 1067-1091.
- Evans, D. H., Piermarini, P. M. & Choe, K .P. 2005. The multifunctional fish gill: dominant site of gas exchange, osmoregulation, acid-base regulation, and excretion of nitrogenous waste. *Physiological Reviews* **85**: 97-177.
- Evans, D. H. 2008. Teleost fish osmoregulation: what have we learned since August Krogh, Homer Smith, and Ancel Keys. *American Journal of Physiology-Regulatory, Integrative and Comparative Physiology* **295**: R704-R713.
- Faria, R. & Navarro, A. 2010. Chromosomal speciation revisited: rearranging theory with pieces of evidence. *Trends in Ecology & Evolution* **25**: 660-669.
- Felsenstein, J. 1981. Skepticism towards Santa Rosalia, or why are there so few kinds of animals? *Evolution* **35**: 124-138.
- Fuller, R. C., McGhee, K. E. & Schrader, M. 2007. Speciation in killifish and the role of salt tolerance. *Journal of Evolutionary Biology* **20**: 1962-1975.
- Fuller, R. C. 2008. Genetic incompatibilities in killifish and the role of environment. *Evolution* **62**: 3056-3068.
- Franchini, P., Colangelo, P., Solano, E., Capanna, E., Verheyen, E. & Castiglia, R. 2010. Reduced gene flow at pericentromeric loci in a hybrid zone involving chromosomal races of the house mouse *Mus musculus domesticus*. *Evolution* **64**: 2020-2032.
- Gavrilets, S. 2004. *Fitness landscapes and the origin of species (MPB-41)*. Princeton University Press.
- Gregorio, O., Berdan, E. L., Kozak, G. M. & Fuller, R. C. 2012. Reinforcement of male mate preferences in sympatric killifish species *Lucania goodei* and *Lucania parva*. *Behavioral*

*Ecology and Sociobiology* **66**: 1429-1436.

Guerrero, R. F. & Kirkpatrick, M. 2014. Local adaptation and the evolution of chromosome fusions. *Evolution* **68**: 2747-2756.

Hall, D.W. & Kirkpatrick, M. 2006. Reinforcement and sex linkage. *Evolution* **60**: 908-921.

Hrbek, T. & Meyer A. 2003. Closing of the Tethys Sea and the phylogeny of Eurasian killifishes (Cyprinodontiformes: Cyprinodontidae). *Journal of Evolutionary Biology* **16**: 17-36.

Hoffmann, A. A. & Rieseberg, L. H. 2008. Revisiting the impact of inversions in evolution: from population genetic markers to drivers of adaptive shifts and speciation? *Annual review of Ecology, Evolution, and Systematics* **39**: 21-42.

Hubbs, C., Walker, B., & Johnson R. 1943. Hybridization in nature between species of American cyprinodont fishes. Contributions of the Laboratory of Vertebrate Biology of the University of Michigan **23**: 1-21

Huyse, T., Van Houdt, J. & Volckaert, F. A. 2004. Paleoclimatic history and vicariant speciation in the sand goby group (Gobiidae, Teleostei). *Molecular Phylogenetics and Evolution* **32**: 324-336.

Larsen, E. H., Deaton, L. E., Onken, H., O'Donnell, M., Grosell, M., Dantzler, W. H. & Weihrauch, D. 2011. Osmoregulation and excretion. *Comprehensive Physiology* **4**: 405-573.

Laurie, C. C. 1997. The weaker sex is heterogametic: 75 years of Haldane's rule. *Genetics* **147**: 937.

Laverty, G. & Skadhauge, E. 2012. Adaptation of teleosts to very high salinity. *Comparative Biochemistry and Physiology Part A: Molecular & Integrative Physiology* **163**: 1-6.

Lee, D. S., Gilbert, C. R., Hocutt, C. H., Jenkins, R. E., McAllister, D. E. & Stauffer Jr, J. R., 1980. *Atlas of North American freshwater fishes*. North Carolina State Museum of Natural History.

Lee, C. E. & M. A. Bell. 1999. Causes and consequences of recent freshwater invasions by saltwater animals. *Trends in Ecology & Evolution* **14**: 284-288.

Li, H., Ruan, J., & Durbin, R. 2008 Mapping short DNA sequencing reads and calling variants using mapping quality scores. *Genome Research* **18**: 1851-1858

Lowry, D. B. & J. H. Willis. 2010. A widespread chromosomal inversion polymorphism contributes to a major life-history transition, local adaptation, and reproductive isolation. *PLoS Biology* **8**: e1000500.

Kirkpatrick, M. & Barton, N. H. 2006. Chromosome inversions, local adaptation and speciation. *Genetics* **173**: 419-434.

Kitano, J., Ross, J. A., Mori, S., Kume, M., Jones, F. C., Chan, Y. F., Absher, D. M., Grimwood, J., Schmutz, J., Myers, R. M., Kingsley, D. M. & Peichel, C. L. 2009. A role for a neo-sex chromosome in stickleback speciation. *Nature* **461**: 1079.

Kitano, J. & Peichel, C.L. 2012. Turnover of sex chromosomes and speciation in fishes. *Environmental Biology of Fishes* **94**: 549-558.

Kozak, G. M., Rudolph, A. B., Colon, B. L. & Fuller, R. C. 2012. Postzygotic isolation evolves before prezygotic isolation between fresh and saltwater populations of the rainwater killifish, *Lucania parva*. *International Journal of Evolutionary Biology* **2012**: 523967.

Kozak, G. M., Brennan, R. S., Berdan, E. L., Fuller, R. C. & Whitehead, A. D. 2014. Functional and population genomic divergence within and between two species of killifish adapted to different osmotic niches. *Evolution* **68**: 63-80.

Kozak, G. M., Roland, G., Rankhorn, C., Falater, A., Berdan, E. L. & Fuller, R. C. 2015. Behavioral isolation due to cascade reinforcement in *Lucania* killifish. *The American Naturalist* **185**: 491-506.

Lemmon, A. R. & Kirkpatrick, M. 2006. Reinforcement and the genetics of hybrid incompatibilities. *Genetics* **173**: 1145-1155.

Meisel, R. P. & Connallon, T. 2013. The faster-X effect: integrating theory and data. *Trends in Genetics* **29**: 537-44.

Noor, M. A., Grams, K. L., Bertucci, L. A. & Reiland, J. 2001. Chromosomal inversions and the reproductive isolation of species. *Proceedings of the National Academy of Sciences* **98**: 12084-12088.

Norman, J. D., Robinson, M., Glebe, B., Ferguson, M. M. & Danzmann, R. G. 2012. Genomic arrangement of salinity tolerance QTLs in salmonids: a comparative analysis of Atlantic salmon (*Salmo salar*) with Arctic charr (*Salvelinus alpinus*) and rainbow trout (*Oncorhynchus mykiss*). *BMC Genomics* **13**: 420.

Nosil, P. 2012. *Ecological speciation*. Oxford: Oxford University Press.

Pennell, M. W., Kirkpatrick, M., Otto, S. P., Vamosi, J. C., Peichel, C. L., Valenzuela, N. & Kitano, J. 2015. Y fuse? Sex chromosome fusions in fishes and reptiles. *PLoS genetics* **11**: e1005237.

Presgraves, D. C. 2008. Sex chromosomes and speciation in *Drosophila*. *Trends in Genetics* **24**: 336-343.



- Presgraves, D. C. 2018. Evaluating genomic signatures of the large X-effect during complex speciation. *Molecular Ecology* **27**: 3822-3830.
- R Core Team (2018). R, A language and environment for statistical computing. R Foundation for Statistical Computing, Vienna, Austria. <https://www.R-project.org/>.
- Sackton, T. B., Corbett-Detig, R. B., Nagaraju, J., Vaishna, L., Arunkumar, K. P., Hartl, D. L. 2014. Positive selection drives faster  $\omega$  evolution in silkmoths. *Evolution* **68**: 2331-42
- Schluter, D. 2009. Evidence for ecological speciation and its alternative. *Science* **323**:737-41.
- Sæther, S. A., Sætre, G. P., Borge, T., Wiley, C., Svedin, N., Andersson, G., Veen, T., Haavie, J., Servedio, M. R., Bureš, S. & Král, M., 2007. Sex chromosome-linked species recognition and evolution of reproductive isolation in flycatchers. *Science* **318**: 95-97.
- Seehausen, O. & Wagner, C. E. 2014. Speciation in freshwater fishes. *Annual Review of Ecology, Evolution, and Systematics* **45**: 621-651.
- Servedio, M. R. & Noor, M. A. 2003. The role of reinforcement in speciation: theory and data. *Annual Review of Ecology, Evolution, and Systematics* **34**:339-364.
- Servedio, M. R. & Sætre, G. P. 2003. Speciation as a positive feedback loop between postzygotic and prezygotic barriers to gene flow. *Proceedings of the Royal Society of London. Series B: Biological Sciences*, **270**:1473-1479.
- Smadja, C. M. & Butlin, R. K. 2011. A framework for comparing processes of speciation in the presence of gene flow. *Molecular Ecology* **20**: 5123-5140.
- St. John, M. E. & Fuller, R. C. 2019. The effects of experimental design on mating preferences and reproductive isolation in killifish. *Behavioral Ecology* **30**: 92-100.
- Taylor, E. B. 1999. Species pairs of north temperate freshwater fishes: evolution, taxonomy, and conservation. *Reviews in Fish Biology and Fisheries* **9**: 299-324.
- Trickett, A.J. & Butlin, R. K. 1994. Recombination suppressors and the evolution of new species. *Heredity* **73**: 339-345.
- Turelli, M. & Orr, H. A. 2000. Dominance, epistasis and the genetics of postzygotic isolation. *Genetics* **154**: 1663-1679.
- Via, S. & West, J. 2008. The genetic mosaic suggests a new role for hitchhiking in ecological speciation. *Molecular Ecology* **17**: 4334-4345.
- Via, S. 2009. Natural selection in action during speciation. *Proceedings of the National Academy of Sciences* **106**: 9939-9946.

Wellband, K., Mérot, C., Linnansaari, T., Elliott, J., Curry, R. A. & Bernatchez, L. 2019. Chromosomal fusion and life history-associated genomic variation contribute to within-river local adaptation of Atlantic salmon. *Molecular Ecology* **28**: 1439-1459.

Wellenreuther, M. & Bernatchez, L. 2018. Eco-Evolutionary Genomics of Chromosomal Inversions. *Trends in Ecology & Evolution* **33**: 427-440.

Wellenreuther, M., Mérot, C., Berdan, E. L. & Bernatchez, L. 2019. Going beyond SNPs: the role of structural genomic variants in adaptive evolution and species diversification. *Molecular Ecology* **28**: 1203-1209.

Whitehead, A. D. 2010. The evolutionary radiation of diverse osmotolerant physiologies in killifish (*Fundulus sp.*). *Evolution* **64**: 2070-2085.

Wickham, H. 2017. ggplot2: Elegant Graphics for Data Analysis. Springer-Verlag New York, 2016.

Uyeno, T. & Miller, R R. 1971. Multiple sex chromosomes in a Mexican cyprinodontid fish. *Nature* **231**: 452-453.

## FIGURES

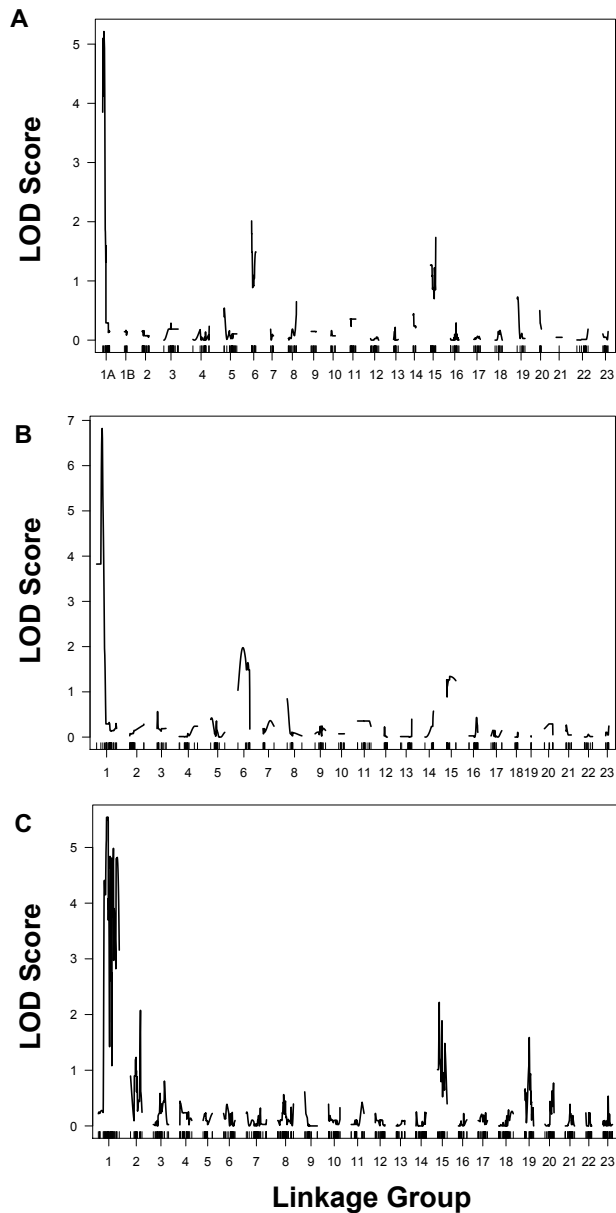

**Figure 1. Sex determining locus linkage mapping.** *L. parva* and *L. goodei* backcrosses using (A) *L. goodei* map and (B) *L. parva* map. (C) Sex determining locus in *L. parva* between population crosses using *L. parva* map. Although individual LOD score thresholds vary, LOD score > 3 is equivalent to  $p < 0.05$ .

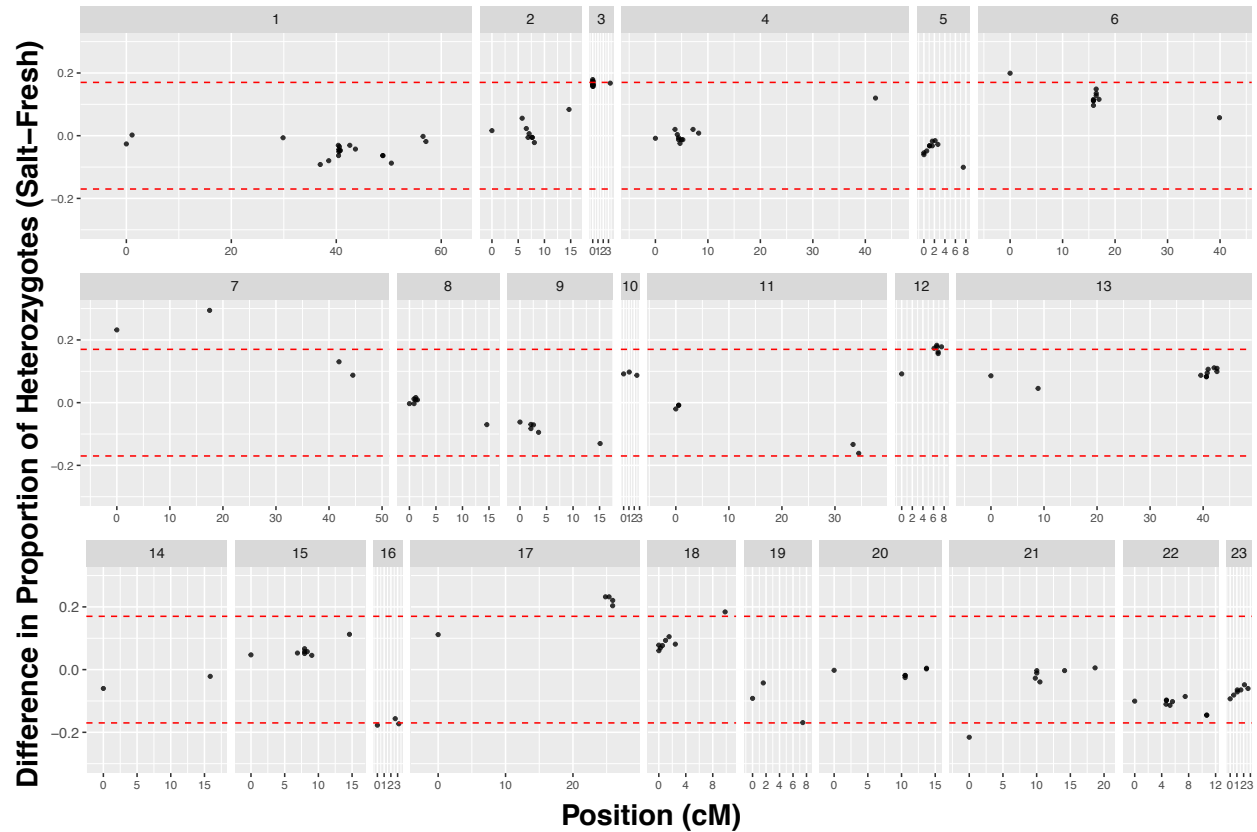

**Figure 2. Salinity tolerance loci.** Difference in proportion of heterozygous individuals in salt vs. freshwater plotted for loci across all 23 linkage groups. Linkage group numbers listed above, position of loci in centiMorgans (cM) on the hybrid map shown. (different linkage groups separated by white partitions). Red lines indicate FDR cutoffs. LG 3, 6, 7, 12, 17 showed outliers. See Table 1 for loci names.

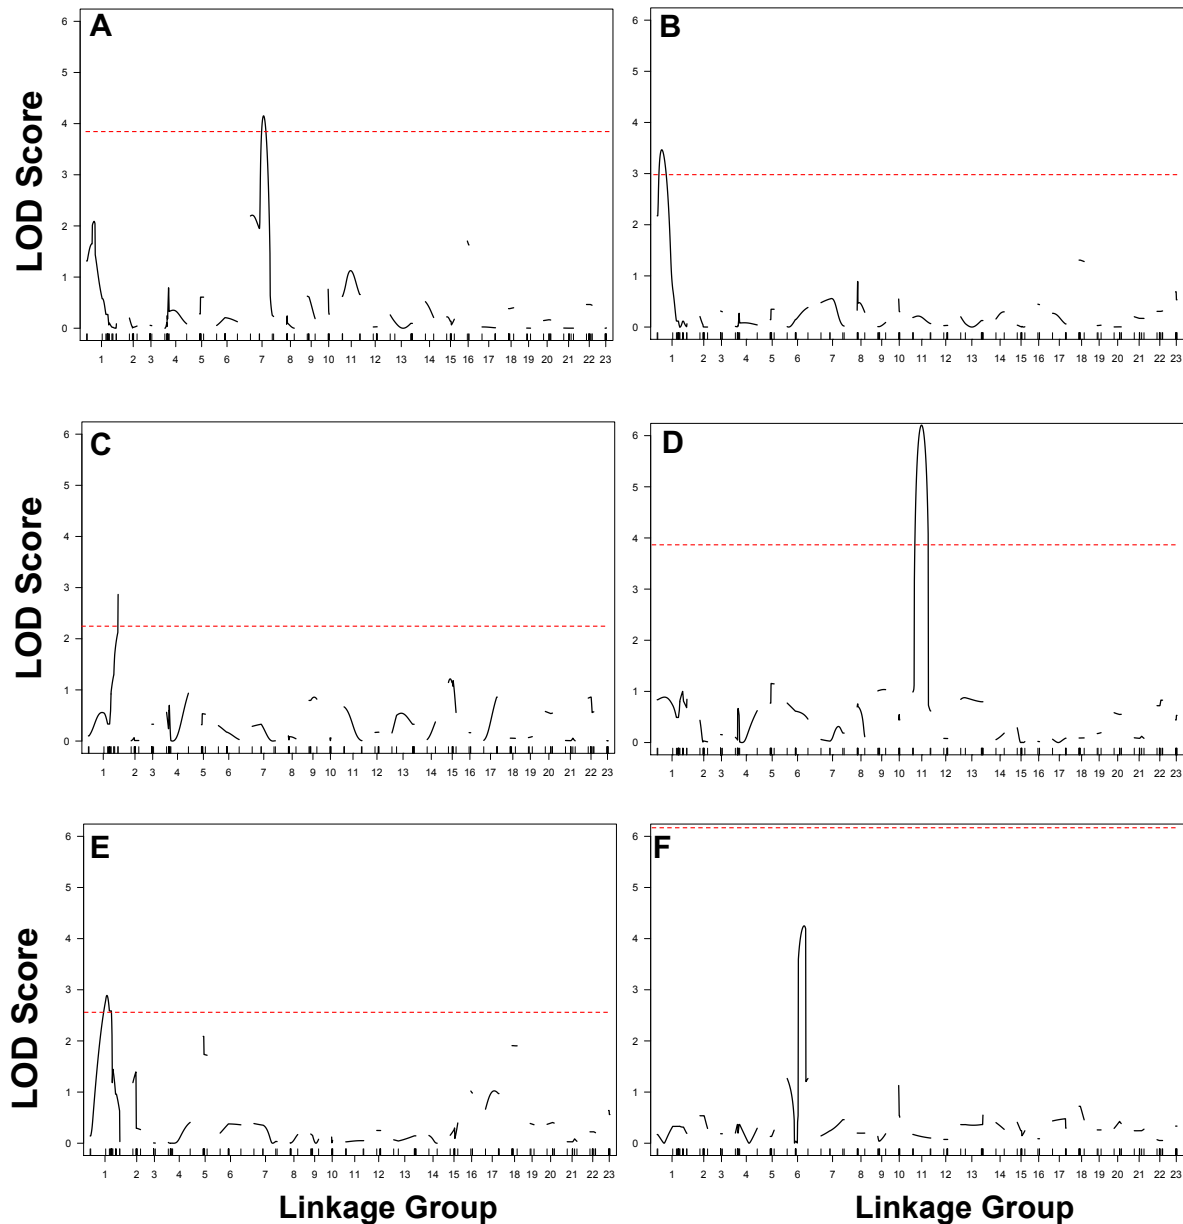

**Figure 3. LOD scores from QTL mapping of reproductive isolating barriers.** A) Male fertility, B) male offspring hatching success, C) male probability of mating with *L. parva*, D) number of eggs produced when male mated to *L. parva*, E) number of eggs produced when male mated to *L. goodei*, F) number of eggs produced when females are mated *L. parva*. Red dashed line indicates the  $p < 0.05$  threshold determined by permutation, which varies due to differences in number of phenotyped individuals and whether or not a binary model is used for each trait.

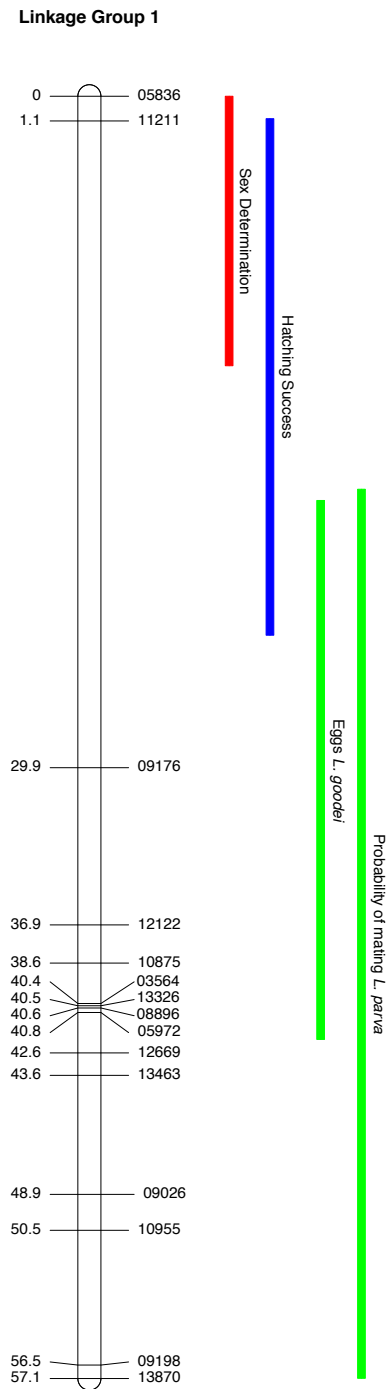

**Figure 4. Sex determining and isolating loci mapping to Linkage group 1.** Bayesian credible intervals for sex determination and isolating traits (solid rectangles) mapped relative to position (in cM) along linkage group 1 (the fused chromosome) from the hybrid linkage map. Blue indicates hybrid incompatibility; green indicates behavioral isolation; sex locus shown in red. The ancestral autosomal portion is ~40-57 cM on this hybrid map.

## TABLES

**Table 1. Salinity associated loci.**

| Marker | Linkage Group | Position (cM) | Proportion of heterozygotes in freshwater | Proportion of heterozygotes in saltwater | Chi-square P-value | FDR P-value |
|--------|---------------|---------------|-------------------------------------------|------------------------------------------|--------------------|-------------|
| 9418   | 7             | 16.96         | 0.34                                      | 0.65                                     | 4.76E-07           | 6.90E-05    |
| 141    | 7             | 17.49         | 0.34                                      | 0.64                                     | 1.31E-06           | 9.50E-05    |
| 14667  | 7             | 0.00          | 0.18                                      | 0.41                                     | 4.13E-06           | 0.0002      |
| 14398  | 17            | 24.83         | 0.44                                      | 0.67                                     | 0.0003             | 0.0095      |
| 18723  | 17            | 25.90         | 0.45                                      | 0.67                                     | 0.0006             | 0.0171      |
| 11877  | 21            | 0.00          | 0.54                                      | 0.33                                     | 0.0007             | 0.0175      |
| 137    | 17            | 25.89         | 0.46                                      | 0.66                                     | 0.0014             | 0.0293      |
| 13073  | 6             | 0.00          | 0.48                                      | 0.67                                     | 0.0018             | 0.0331      |
| 13872  | 18            | 9.84          | 0.33                                      | 0.51                                     | 0.0022             | 0.0354      |
| 11937  | 3             | 0.00          | 0.34                                      | 0.52                                     | 0.0037             | 0.0472      |
| 10789  | 3             | 0.00          | 0.35                                      | 0.52                                     | 0.0048             | 0.0472      |
| 11514  | 3             | 0.08          | 0.34                                      | 0.51                                     | 0.0049             | 0.0472      |
| 14634  | 3             | 3.34          | 0.34                                      | 0.51                                     | 0.0059             | 0.0472      |
| 11023  | 12            | 6.11          | 0.41                                      | 0.58                                     | 0.0059             | 0.0472      |
| 15386  | 12            | 6.62          | 0.38                                      | 0.57                                     | 0.0036             | 0.0472      |
| 5062   | 12            | 6.66          | 0.39                                      | 0.57                                     | 0.0044             | 0.0472      |
| 10999  | 16            | 0.00          | 0.62                                      | 0.45                                     | 0.0043             | 0.0472      |
| 11538  | 16            | 3.18          | 0.61                                      | 0.43                                     | 0.0057             | 0.0472      |

**Table 2. Genotypes between markers on different linkage groups with significant frequency distortion.** Genotypes refers to the number of individuals that are homozygous for the *L. goodei* marker at both loci (AABB), are heterozygous at both loci (AaBb), or are homozygous at one locus but heterozygous at another (AABb and AaBB). 1-sex indicates a marker on linkage group 1 located within the sex determining region (marker ID in bold); 1\* indicates a marker on linkage group 1 that is adjacent to the sex determining region (marker ID in italics).

| Linkage Groups |             | FDR p-value | Genotypes |      |      |      | Marker ID    |          |
|----------------|-------------|-------------|-----------|------|------|------|--------------|----------|
| LG Marker 1    | LG Marker 2 |             | AABB      | AABb | AaBB | AaBB | Marker 1     | Marker 2 |
| 1 - sex        | 13          | 1.53E-23    | 57        | 0    | 0    | 64   | <b>13005</b> | 02161    |
| 2              | 23          | 1.53E-23    | 55        | 0    | 0    | 66   | 03425        | 11531    |
| 21             | 22          | 2.10E-23    | 57        | 0    | 0    | 62   | 02541        | 06333    |
| 2              | 23          | 2.10E-23    | 54        | 0    | 0    | 65   | 17258        | 11531    |
| 2              | 23          | 3.67E-23    | 55        | 1    | 0    | 65   | 15948        | 11531    |
| 2              | 23          | 3.67E-23    | 54        | 0    | 1    | 66   | 14340        | 11531    |
| 21             | 22          | 8.33E-23    | 57        | 1    | 0    | 61   | 23270        | 06333    |
| 21             | 22          | 4.27E-22    | 57        | 0    | 2    | 60   | 03323        | 06333    |
| 21             | 22          | 4.27E-22    | 57        | 0    | 2    | 60   | 03556        | 06333    |
| 21             | 22          | 6.34E-22    | 57        | 0    | 2    | 59   | 03555        | 06333    |
| 22             | 21          | 2.46E-21    | 56        | 2    | 1    | 60   | 06333        | 06712    |
| 1*             | 13          | 1.26E-18    | 44        | 0    | 0    | 51   | <i>10924</i> | 02161    |
| 1 - sex        | 13          | 5.93E-11    | 46        | 8    | 8    | 52   | <b>11211</b> | 02161    |
| 1 - sex        | 13          | 8.93E-07    | 40        | 7    | 14   | 45   | <b>11521</b> | 02161    |
| 13             | 16          | 0.0066      | 38        | 16   | 19   | 48   | 02161        | 12642    |
| 1 - sex        | 16          | 0.0066      | 38        | 19   | 16   | 48   | <b>13005</b> | 12642    |
| 13             | 16          | 0.012       | 37        | 16   | 20   | 48   | 02161        | 04992    |
| 13             | 16          | 0.012       | 37        | 16   | 20   | 48   | 02161        | 17027    |
| 1 - sex        | 16          | 0.012       | 37        | 20   | 16   | 48   | <b>13005</b> | 04992    |
| 1 - sex        | 16          | 0.012       | 37        | 16   | 20   | 48   | <b>13005</b> | 17027    |
| 16             | 13          | 0.025       | 36        | 21   | 16   | 48   | 01506        | 02161    |
| 1 - sex        | 16          | 0.025       | 36        | 21   | 16   | 48   | <b>13005</b> | 01506    |
| 13             | 16          | 0.036       | 36        | 17   | 19   | 45   | 02161        | 13269    |
| 1 - sex        | 16          | 0.036       | 36        | 17   | 19   | 45   | <b>13005</b> | 13269    |
| 13             | 16          | 0.046       | 35        | 16   | 22   | 48   | 02161        | 11538    |
| 1 - sex        | 16          | 0.046       | 35        | 22   | 16   | 48   | <b>13005</b> | 11538    |



**Table 3. Summary of locations of isolating barriers.**

| Linkage Group | Intrinsic Isolation |                |                  | Behavioral Isolation             |                                              |                                   | Adaptation            |
|---------------|---------------------|----------------|------------------|----------------------------------|----------------------------------------------|-----------------------------------|-----------------------|
|               | Incompatibilities   | Male Fertility | Hybrid viability | Eggs laid with <i>L. parva</i> ♀ | Probability of mating with <i>L. parva</i> ♀ | Eggs laid with <i>L. goodei</i> ♀ | Survival in saltwater |
| 1             |                     |                |                  |                                  |                                              |                                   |                       |
| 2             |                     |                |                  |                                  |                                              |                                   |                       |
| 3             |                     |                |                  |                                  |                                              |                                   |                       |
| 4             |                     |                |                  |                                  |                                              |                                   |                       |
| 5             |                     |                |                  |                                  |                                              |                                   |                       |
| 6             |                     |                |                  |                                  |                                              |                                   |                       |
| 7             |                     |                |                  |                                  |                                              |                                   |                       |
| 8             |                     |                |                  |                                  |                                              |                                   |                       |
| 9             |                     |                |                  |                                  |                                              |                                   |                       |
| 10            |                     |                |                  |                                  |                                              |                                   |                       |
| 11            |                     |                |                  |                                  |                                              |                                   |                       |
| 12            |                     |                |                  |                                  |                                              |                                   |                       |
| 13            |                     |                |                  |                                  |                                              |                                   |                       |
| 14            |                     |                |                  |                                  |                                              |                                   |                       |
| 15            |                     |                |                  |                                  |                                              |                                   |                       |
| 16            |                     |                |                  |                                  |                                              |                                   |                       |
| 17            |                     |                |                  |                                  |                                              |                                   |                       |
| 18            |                     |                |                  |                                  |                                              |                                   |                       |
| 19            |                     |                |                  |                                  |                                              |                                   |                       |
| 20            |                     |                |                  |                                  |                                              |                                   |                       |
| 21            |                     |                |                  |                                  |                                              |                                   |                       |
| 22            |                     |                |                  |                                  |                                              |                                   |                       |
| 23            |                     |                |                  |                                  |                                              |                                   |                       |
